# Supplementary material for: The Third Plague Pandemic in Europe
Source: Proc Biol Sci. 2019 Apr 17;286(1901):20182429. doi: 10.1098/rspb.2018.2429 (PMC6501942; doi:10.1098/rspb.2018.2429)
Supplement: Dataset [file rspb20182429supp1.xlsx]

## Sheet: Table S1
Electronic Supplementary Material Proceedings of the Royal Society B DOI: 10.1098/rspb.2018.2429 The Third Plague Pandemic in Europe Barbara Bramanti, Katharine R. Dean, Lars Walløe, Nils Chr. Stenseth
Index	Location	Country	Start	End	Cases	Deaths	Notes	Source (PubMed Central ID)
1	Porto	Portugal	16-Aug-1899	31-Oct-1899	223	77		PMC2014162
2	Lisbon	Portugal	16-Aug-1899					PMC2014162
3	Port of Leixões	Portugal	30-Oct-1899					PMC2014162
4	Porto	Portugal	1-Nov-1899	20-Nov-1899	41	17		PMC2014162
5	Lisbon	Portugal	12-Nov-1899		1	1		PMC2014162
6	Porto	Portugal	12-Jun-1900		1			PMC2014148
7	London	United Kingdom	3-Aug-1900		4	2		PMC2014148
8	Glasgow	United Kingdom	31-Aug-1900	6-Oct-1900	28	8		PMC2014148
9	Govan, Glasgow	United Kingdom	4-Sep-1900		1	1		PMC2014148
10	Bremen	Germany	27-Sep-1900	5-Nov-1900	1	1	On a SS from Buenos Ayres	PMC2014148
11	Llandaff, Cardiff	United Kingdom	4-Oct-1900		1	1	From Rosario	PMC2014148
12	Hull	United Kingdom	8-Jan-1901	31-Jan-1901		8	On steamship Friary	PMC1998804
13	Cardiff	United Kingdom	8-Feb-1901		1			PMC1998804
14	Southampton	United Kingdom	21-Mar-1901		1		On SS Simia	PMC1998804
15	Les îles du Frioul	France	7-Jul-1901		15		From steamship Laos from Port Said	PMC1998870
16	Naples	Italy	7-Sep-1901	12-Oct-1901	26	8		PMC1998870
17	Glasgow	United Kingdom	19-Oct-1901	1-Nov-1901	5	1		PMC1998870
18	Liverpool	United Kingdom	26-Oct-1901	7-Nov-1901	5	3		PMC1998870
19	Dunkirk	France	11-Jun-1902	13-Jun-1902		2	Two deaths on SS City of Perth, from Calcutta etc.	PMC1999014
20	Marseille	France	3-Jul-1902		1		One case on SS Espagne from Buenos Ayres	PMC1999014
21	Barcelona	Spain	16-Jul-1902		1		One case on SS Duca di Galliera from Buenos Ayres	PMC1999014
22	Marseille	France	1-Dec-1902		1		On SS Pehio from Batoum	PMC1998972
23	Berlin	Germany	5-Jun-1903	18-Jun-1903	1		Nurse of case previously reported	PMC2129207
24	Licata	Italy	14-Sep-1903	20-Sep-1903	1	1		PMC2129207
25	Marseille	France	15-Sep-1903		10	5		PMC2129207
26	South Shields	United Kingdom	19-Sep-1904		1		On SS Bishopegate from Rosario	PMC1998781
27	Liverpool	United Kingdom	7-Feb-1905			1	From steampship Crewe Hall from Rangoon	PMC2080951
28	Cádiz	Spain	1-Apr-1905	30-Apr-1905		1		PMC2080951
29	Leith, Edinburgh	United Kingdom	7-May-1905	13-May-1905	4	1		PMC2080951
30	Manchester	United Kingdom	12-Jun-1905			1	On SS Hylas from Buenos Ayers via Hamburg	PMC2080979
31	London	United Kingdom	30-Nov-1905		1		On SS Weybridge from the Rio de la Plata	PMC2080951
32	Trieste	Italy	8-Nov-1906			1		PMC2081032
33	Gröden	Germany	28-May-1907		1		On Br SS Warfedale from Buenos Aires	PMC1999365
34	Marseille	France	17-Sep-1907	18-Sep-1907	2		In quarantine at Frioul	PMC1999435
35	Glasgow	United Kingdom	17-Oct-1907	23-Oct-1907	1			PMC1999435
36	Glasgow	United Kingdom	17-Aug-1908	31-Aug-1908	1	1	Received out of date. ??1907	PMC1999472
37	Trieste	Italy	21-Sep-1908		2	1	From SS Erzherzog Frans Ferdinand from Bombay	PMC1999510
38	Liverpool	United Kingdom	23-Oct-1908	8-Nov-1908	3	2	From barge Wesley. Last death occurred Nov. 8	PMC1999510
39	Elstree	United Kingdom	3-Feb-1909	4-Feb-1909	1	1	At plague laboratory	PMC1999252
40	Rhodes	Greece	22-May-1910	28-May-1910			Present	PMC1999343
41	Valletta	Malta	16-Jul-1910		1		In quarantine station on Comino Island, from SS North Wales	PMC1999343
42	Freston, Ipswich	United Kingdom	16-Sep-1910	29-Sep-1910	4	4		PMC1999343
43	London	United Kingdom	18-Oct-1910	19-Oct-1910	2	1	Case Oct. 18 from SS Oceana from Bombay; case Oct. 19 from SS Hindle from Bombay	PMC1999343
44	Lisbon	Portugal	24-Oct-1910	8-Nov-1910	9	2	First case repaired boilers on SS Africa from Mozambique	PMC1999343
45	Suffolk	United Kingdom	10-Oct-1911		1		In Admiralty Barracks, parish of Shotley, Samford rural district	PMC1999129
46	Trieste	Italy	14-Apr-1912	25-Apr-1912	2		In isolation hospital from SS Amphrtrite from Messina via Port Said and Alexandria	PMC1999236
47	Liverpool	United Kingdom	27-Apr-1912	30-Apr-1912	1	1	In the Royal Southern Hospital, from SS Italian Prince, which arrived at Liverpool Apr 19 laden with fruit and grain from Mediterranean ports	PMC1999173
48	Liverpool	United Kingdom	26-Jul-1912		1			PMC1999236
49	Hamburg	Germany	2-Sep-1912	5-Sep-1912	2		2 cases on SS Bellailsa from Rosario, via Cape Verde Islands	PMC1999236
50	River Tyne	United Kingdom	10-Sep-1912	16-Sep-1912	1	1	From SS Bellailsa from Rosario, via Hamburg	PMC1999236
51	Pireas	Greece	21-Aug-1913	3-Sep-1913	8	2		PMC1999531
52	Athens	Greece	29-Aug-1913		1			PMC1999531
53	Trieste	Italy	1-Nov-1913	8-Nov-1913		1	1 fatal case on a post steaer from Buenos Aires	PMC1999531
54	Chios	Greece	2-Aug-1914				Epidemic, among the military, Sep 30, ended	PMC1999955
55	Pireas	Greece	7-Aug-1914	9-Sep-1914	16	2	Epidemic, among the military, Sep 30, ended	PMC1999955
56	Liverpool	United Kingdom	8-Aug-1914	12-Aug-1914	9	3		PMC1999955
57	Catania	Italy	1-Sep-1914				Since Sep 1, 1914 there have been 17 officially reported cases and unauthenticated rumors of others	PMC1999955
58	Syros	Greece	3-Sep-1914	4-Sep-1914	1	1		PMC1999955
59	Thessaloniki	Greece	15-Sep-1914		3			PMC1999955
60	Lisbon	Portugal	8-Oct-1914	9-Oct-1914	8	8	Pneumonic form	PMC1999955
61	Pireas	Greece	17-Jan-1915	27-Jan-1915	1		Sep 12, present in Drama and Kavala	PMC1999864
62	Thessaloniki	Greece	4-Apr-1915	10-Apr-1915	5	7		PMC1999864
63	Zakynthos	Greece	1-Aug-1915	11-Oct-1915	14	13	Present, Oct. 23	PMC1999899
64	Athens	Greece	8-Dec-1915	20-Dec-1915		1		PMC2013768
65	Syros	Greece	16-Jan-1916		16	10		PMC2013768
66	Pireas	Greece	29-Jan-1916		7	5		PMC2013768
67	Bristol	United Kingdom	18-Aug-1916	31-Aug-1916	3			PMC2013829
68	Hull	United Kingdom	19-Aug-1916	31-Aug-1916	2	1		PMC2013829
69	Liverpool	United Kingdom	22-Sep-1916	6-Oct-1916	6	3		PMC2013829
70	Chios	Greece	29-Sep-1916				Present	PMC2013829
71	Volos	Greece	29-Sep-1916	1-Nov-1916			Slight epidemic. Epidemic declard extinct Nov 1, 1916	PMC2013829
72	Pireas	Greece	9-Dec-1916		1			PMC2013829
73	London	United Kingdom	3-May-1917	8-May-1917	2		2 in hospital at port. From SS Sardinia from Australia and oriental ports	PMC1999778
74	Gravesend	United Kingdom	13-Aug-1917	24-Aug-1917	3	1	From SS Matiana (14 Jul-18 Jul 9 cases, 6 deaths en route for port of London)	PMC1999778
75	Dundee	United Kingdom	19-May-1918		3	1	At Dundee, Scotland from Calcutta. One of cases pneumonic.	PMC1999841
76	Rochester	United Kingdom	2-Jun-1918		1	1	From SS Somali at Gravesend from Bombay (May 19: At Gravesend, England, from Bombay. Further case developed June 2 in member of creat at Rochester, England)	PMC1999841
77	Erwarton, Ipswich	United Kingdom	19-Jun-1918		1	1	Rural district, Sanford, East Suffolk	PMC1999841
78	London	United Kingdom	17-Aug-1918		6		On vessel from Calcutta (Aug 10-Aug 21: SS Hector at Gravesend, port of London, 6 members of crew)	PMC1999841
79	Liverpool	United Kingdom	13-May-1919	17-May-1919	1	1	On vessel SS City of Sparta at Liverpool: Case, a native member of the crew	PMC1996952
80	Avonmouth	United Kingdom	25-Jul-1919		1		On vessel SS Framlington Court from Alexandria, May 30: from Montreal, July 4; from Sydney, Nova Scotia, July 9; at Avonmouth, England July 22, 1919	PMC1996952
81	Liverpool	United Kingdom	30-Jul-1919		1	1	In dock laborer	PMC1996952
82	Marseille	France	16-Aug-1919	2-Sep-1919	5	3	Total number of cases reported to Aug 27, 11; deaths, 3	PMC1996952
83	London	United Kingdom	19-Aug-1919		1		On vessel SS Clan Lamont in dock in port of London, England. Vessel left Calcutta Mar 23; arrived Buenos Aires May 9; sailed June 20; arrived Montevideo and sailed June 21; arrived at St. Vincent, Cape Verde Islands July 10	PMC1996952
84	Barcelona	Spain	15-Sep-1919	6-Oct-1919	10			PMC1996952
85	Thessaloniki	Greece	1919-10-06	20-Dec-1920	19	7		PMC1996806
86	Athens	Greece	20-Oct-1919		5	3		PMC1996952
87	Pireas	Greece	20-Oct-1919		2	1		PMC1996952
88	London	United Kingdom	21-Oct-1919	27-Oct-1919	6		On vessel SS Nagoya arrived Oc. 25 at port of London, England. Left Yokohama, Aug 30. Oriental ports of call: Kobe, Shaghai, Hong kong, Penang, Singapore, and Colombo. In Egypt, Port Said. In Europe, Marseille, Gibraltar, and Plymouth.	PMC1996952
89	London	United Kingdom	28-Feb-1920	5-Mar-1920	2	2	On vessel SS Alps Maru at port of London, England. Vessel left Yokohama, Japan Dec 3, 1919; arrived Suez Jan 21, 1920. Destination Hamburg.	PMC1996806
90	Pireas	Greece	25-Apr-1920	20-May-1920	7			PMC1996806
91	Marseille	France	1-Jun-1920	31-Aug-1920	58	20		PMC1996866
92	Paris	France	1-Jun-1920	15-Oct-1920	50	11	In suburbs, June-Nov 2, 1920: Cases, 38; deaths, 19, 1 (Suspect.)	PMC1996866
93	Liverpool	United Kingdom	20-Jun-1920	26-Jun-1920	1	1		PMC1996845
94	Catania	Italy	22-Jun-1920	3-Jul-1920	3	2		PMC1996845
95	Pireas	Greece	29-Jun-1920	20-Sep-1920	13	1		PMC1996845
96	Kavala	Greece	5-Jul-1920	3-Oct-1920	4			PMC1996845
97	Zakynthos	Greece	22-Jul-1920		2			PMC1996845
98	Athens	Greece	19-Aug-1920	14-Oct-1920	3	2		PMC1996845
99	Nafplion	Greece	21-Aug-1920		20			PMC1996845
100	Thessaloniki	Greece	25-Sep-1920	8-Oct-1920	4			PMC1996845
101	Lisbon	Portugal	2-Oct-1920	17-Nov-1920	93	27		PMC1996866
102	Chios	Greece	14-Oct-1920		1			PMC1996845
103	Dublin	Ireland	18-Oct-1920		1		1 case reported Dec 15, 1920: date of occurrence Oct 18, 1920	PMC1996866
104	Kavala	Greece	29-Oct-1920	7-Nov-1920	2			PMC1996866
105	Paris	France	1-Jan-1921	13-Jan-1921	3	1		PMC1996866
106	Lisbon	Portugal	1-Feb-1921	28-Feb-1921	6		Pneumonic; occurring in one family	PMC1999984
107	Lisbon	Portugal	29-Jul-1921	3-Sep-1921	7			PMC1996902
108		Poland	9-Aug-1921		8		In border province, Aug 9, 1921: Cases, 8	PMC1996902
109	Naples	Italy	4-Sep-1921	7-Oct-1921	5		2 were workers in mill; plague-infected rats found on premises	PMC1996902
110	Rhodes	Greece	20-Sep-1921	8-Oct-1921	7	1	1 fatal case reported late in August, 1921	PMC1996902
111	Pireas	Greece	23-Sep-1921		3			PMC1996902
112	Rhodes	Greece	13-Oct-1921		3	1		PMC1999984
113	Catania	Italy	16-Oct-1921	27-Nov-1921	1	1	Total, Oct 16-Nov 27, 1921: Cases, 8 (of which 1 doubtful): deaths, 5. Jan-Feb, 1922: 28 plague-infected rats found.	PMC1999984
114	Torre Annunziata, Naples	Italy	22-Oct-1921	Dec 27 1921	2		17 miles from city of Naples	PMC1999984
115	Catania	Italy	24-Oct-1921	21-Nov-1921	3			PMC1996902
116	Venice	Italy	27-Oct-1921		1			PMC1999984
117	Lisbon	Portugal	15-Dec-1921		1	1		PMC1999984
118	Preveza	Greece	8-Feb-1922				Outbreak. Port on the Ionian Sea	PMC1999984
119	Dunkirk	France	24-Mar-1922			1	In hospital, from steamship City of Genoa, from Bombay. Vessel SS City of Genoa at Suez and Port Said, Egypt, from Karachi and Bombay, India, for Plymouth, England. One fatal case at sea en route to Suez; 1 case on arrival. At Port Said, 2 cases of which 1 fatal. At Dunkirk, France, Mar 24, 1922: Several cases on arrival; 1 fatal case in hospital at Dunkirk.	PMC1999984
120	Patras	Greece	24-Apr-1922	25-Jun-1922	5	3		PMC2000016
121	Catania	Italy	17-Jun-1922		1			PMC2000016
122	Naples	Italy	18-Jul-1922	28-Sep-1922	19		Occuring in suburbs, viz, at Torre Annunziata, July 18-Sept 28, 1922, 18 cases; San Giovanni a Teduccio, July 25, 1922, 1 case	PMC2000016
123	Messina	Italy	19-Jul-1922				On Greek vessel at Messina, Italy. Cases on board. Vessel not allowed to enter.	PMC2000016
124	Lisbon	Portugal	23-Jul-1922	10-Nov-1922	16	16	Aug 1-Oct 23, 1922: Deaths, 10	PMC2000016
125	Pireas	Greece	1-Aug-1922	31-Aug-1922	3	1		PMC2000016
126	Paris	France	11-Aug-1922	18-Aug-1922	4			PMC2000016
127	Barcelona	Spain	24-Sep-1922	14-Nov-1922	23	9	Stated to be confined to factory in which disease first appeared Oct 18,1922: 18 cases present	PMC2000016
128	Cartagena	Spain	18-Oct-1922		2			PMC2000016
129	Valencia	Spain	18-Oct-1922		2			PMC2000016
130	Lisbon	Portugal	10-Nov-1922	29-Nov-1922	4	2		PMC1975895
131	Barcelona	Spain	15-Nov-1922	18-Dec-1922	24	9	Sep 24-Nov 14, 1922: Cases, 23; deaths, 9	PMC1975895
132	Porto	Portugal	21-Jan-1923	27-Jan-1923		1		PMC1975895
133	Málaga	Spain	27-Feb-1923		20		17 suspected cases.	PMC1975895
134	Paris	France	13-Aug-1923		1		Published in Public Health Reports, Sept. 14, 1923, pp. 2189 and 2190	PMC1975922
135	Syros	Greece	10-Sep-1923				Present	PMC1975922
136	Lisbon	Portugal	25-Oct-1923		2	1		PMC1975922
137	Málaga	Spain	1-Dec-1923	31-Dec-1923	4			PMC1975963
138	Lisbon	Portugal	13-Dec-1923	21-Dec-1923	7			PMC1975963
139	Lisbon	Portugal	31-Dec-1923	6-Jan-1924		1		PMC1975963
140	Kalamata	Greece	18-Apr-1924	24-Apr-1924			Several deaths	PMC1975963
141	Patras	Greece	18-Apr-1924	24-Apr-1924			Several deaths	PMC1975963
142	Thessaloniki	Greece	3-Jul-1924	4-Jul-1924	2			PMC1976008
143	Patras	Greece	7-Jul-1924		36			PMC1976008
144	Marseille	France	10-Jul-1924		1		On vessel SS Amboise at Marseille, France; removed to quarantine station. Case occurred in an Arab fireman embared at Aden. Vessel left Yokohama May 30 and Colombo, Ceylon, June 22, 1924.	PMC1976008
145	Kalamata	Greece	1924-07-15		29	6	Reported on July 15, 1924: cases, 29; deaths, 6	PMC1976008
146	Symi	Greece	26-Aug-1924		11	2		PMC1976008
147	Naples	Italy	15-Sep-1924		3	1	Including a suburb of Portici, 1 case	PMC1976008
148	Paris	France	1-Oct-1924	31-Oct-1923	2		Bubonic, occurring in suburbs, St. Medard and St. Ouen	PMC1976008
149	Patras	Greece	5-Apr-1925		1			PMC1976009
150	Athens	Greece	1-Jul-1925	10-Oct-1925	64	18		PMC1976039
151	Pireas	Greece	18-Jul-1925	14-Aug-1925	9		2 cases on Steamship Arcadia July 24-27 at Piraeus, Greece, from Alexandria, Egypt. 1 case on Steamship Anatolia Aug 8, at Piraeus, Greece from Alexandria.	PMC1976039
152	Marseille	France	13-Aug-1925	18-Aug-1925	3			PMC1976039
153	Pyrgos	Greece	1-Sep-1925		1			PMC1976039
154	Secondigliano, Napolini	Italy	3-Sep-1925	5-Sep-1925	2		From the Bulletin Quarantenaire Egypt Sept 17, 1925	PMC1976039
155	Rhodes	Greece	12-Sep-1925		1		On Steamship Naxos, at Rhodes from Dodecanese Islands via Alexandria, Egypt. The vessel left Alexandria Sept 9, 1925	PMC1976039
156	Thessaloniki	Greece	22-Sep-1925	12-Oct-1925	2	1		PMC1976039
157	Chateau-Gombert	France	13-Oct-1925		1	1	Distant 8.5 kilometers from Marseille	PMC1976039
158	Athens	Greece	21-Oct-1925	31-Oct-1925	18	3	Including Piraeus	PMC1976039
159	Athens	Greece	1-Nov-1925	30-Nov-1925	18	4	Including Piraeus	PMC2000042
160	Cephalonia	Greece	10-Nov-1925		1		Ionian Islands. Case stated to have originated at Patras	PMC1976039
161	Patras	Greece	13-Nov-1925	12-Dec-1925	4	1		PMC2000042
162	Vilvoorde	Belgium	1-Dec-1925	8-Dec-1925	1	1		PMC2000042
163	Athens	Greece	1-Jan-1926	31-Mar-1926	25	4	On island of Crete	PMC2000042
164	Heraklion	Greece	4-Feb-1926		1			PMC2000042
165	Athens	Greece	1-Apr-1926	31-May-1926	16	4	Including Piraeus	PMC2000087
166	Zakynthos	Greece	17-May-1926		1			PMC2000087
167	Patras	Greece	27-May-1926	12-Jun-1926	4	1		PMC2000087
168	Marseille	France	8-Jul-1926		1	1	Reported on July 24, 1926	PMC2000087
169	Patras	Greece	25-Jul-1926	29-Oct-1926	9	5		PMC2000087
170	Athens	Greece	1-Aug-1926	30-Sep-1926	20	5	Including Piraeus	PMC2000087
171	Saint-Denis	France	2-Aug-1926		1		Vicinity of Paris	PMC2000087
172	Saint-Ouen	France	14-Aug-1926		2		Suburb of Paris	PMC2000087
173	Liverpool	United Kingdom	29-Aug-1926	4-Sep-1926	2	1		PMC2000087
174	Liverpool	United Kingdom	1-Sep-1926		2	2	On SS Zaria at Liverpool, England, from Lago, Nigeria, West Africa	PMC2000087
175	Paris	France	18-Oct-1926		1			PMC2000087
176	Pireas	Greece	1-Nov-1926	31-Nov-1926	19	5		PMC1999045
177	Lisbon	Portugal	22-Nov-1926	26-Nov-1926	3	2		PMC1999045
178	Eleftheroupoli	Greece	27-Nov-1926		1	1		PMC1999045
179	Patras	Greece	28-Nov-1926	4-Dec-1926		1		PMC1999045
180	Pireas	Greece	1-Jan-1927	31-Mar-1927	24	3		PMC1999045
181		Greece	1-May-1927		4	3		PMC1999075
182	Patras	Greece	30-May-1927	5-Nov-1927	10	3		PMC1999075
183	Athens	Greece	1-Jun-1927	29-Aug-1927	3		Including Piraeus	PMC1999075
184	Mytilene	Greece	9-Aug-1927	25-Sep-1927	6			PMC1999075
Index	Location	Country	Column2	Week ending	Cases	Deaths	Notes	Source (PubMed Central ID)
1	Patras	Greece		1927-09-03	2			PMC1996702
2	Mytilene	Greece		1927-09-24	5			PMC1996702
3	Patras	Greece		1927-10-01	1	1		PMC1996702
4	Mytilene	Greece		1927-10-08	1			PMC1996702
5	Mytilene	Greece		1927-10-29	1			PMC1996706
6	Patras	Greece		1927-11-05	1	1		PMC1996706
7	Mytilene	Greece		1927-11-12	2			PMC1996706
8	Vigo	Spain		1927-11-19	3		On SS Aghios Garasimos at Vigo, Spain	PMC1996706
9	Mytilene	Greece		1927-11-26	1			PMC1996713
10	Mytilene	Greece		1927-12-03	1			PMC1996713
11	Mytilene	Greece		1927-12-10	1			PMC1996713
12	Athens	Greece		1928-01-07	1		Includes Pireas	PMC1996718
13	Athens	Greece		1928-01-21	2	1	Includes Pireas	PMC1996718
14	Corfu	Greece		1928-06-16	1			PMC1996747
15	Corfu	Greece		1928-06-23	14	3		PMC1996747
16	Lisbon	Portugal		1928-06-30	1			PMC1996737
17	Patras	Greece		1928-07-14	1	1		PMC1996762
18	Patras	Greece		1928-07-28	1	1		PMC1996747
19	Corfu	Greece		1928-08-04	1			PMC1996764
20	Patras	Greece		1928-08-11	1			PMC1996764
21	Corfu	Greece		1928-09-01	1			PMC1996782
22	Patras	Greece		1928-09-08	1			PMC1996782
23	Athens	Greece		1928-09-22	2		Includes Pireas	PMC1996782
24	Athens	Greece		1928-09-29	2		Includes Pireas	PMC1996787
25	Patras	Greece		1928-09-29	1			PMC1996787
26	Athens	Greece		1928-10-06	2		Includes Pireas	PMC1996787
27	Athens	Greece		1928-10-13	1		Includes Pireas	PMC1996787
28	Athens	Greece		1928-11-03	4		Includes Pireas	PMC1996787
29	Athens	Greece		1928-11-10	1		Includes Pireas	PMC1996787
30	Corfu	Greece		1928-11-17	1			PMC1996787
31		Greece		1928-12-31	2	1	Monthly data	PMC2000138
32		Greece		1929-01-31	3	1	Monthly data	PMC2000138
33		Greece		1929-02-28	1		Monthly data	PMC2000161
34		Greece		1929-04-30	1		Monthly data	PMC2000161
35		Greece		1929-07-31	3	1	Monthly data	PMC2000189
36	Patras	Greece		1929-08-31	1			PMC2000189
37	Pireas	Greece		1929-08-31	1			PMC2000189
38	Pireas	Greece		1929-09-07	1			PMC2000189
39	Patras	Greece		1929-09-14	1			PMC2000218
40	Pireas	Greece		1929-09-14	1			PMC2000189
41	Patras	Greece		1929-09-21	1			PMC2000218
42	Paris	France		1929-09-28	1			PMC2000195
43	Naples Province	Italy		1929-09-28	2	1		PMC2000218
44		Greece		1929-09-30	5	2	Monthly data	PMC2000218
45	Patras	Greece		1929-10-05	1			PMC2000218
46	Patras	Greece		1929-10-12	1			PMC2000218
47	Patras	Greece		1929-10-19	1			PMC2000218
48		Greece		1929-10-31	5	2	Monthly data	PMC2000229
49	Messenia	Greece		1929-11-09	2			PMC2000218
50	Patras	Greece		1929-11-09	1			PMC2000229
51	Patras	Greece		1929-11-16	1			PMC2030468
52	Pyrgos	Greece		1929-11-16	6			PMC2000229
53	Pyrgos	Greece		1929-11-23	2			PMC2000229
54	Pireas	Greece		1929-12-07	1			PMC2000229
55		Greece		1929-12-31	1		Monthly data	PMC2030488
56	Pireas	Greece		1930-01-25	1			PMC2030476
57	Patras	Greece		1930-03-29	1			PMC2030488
58	Pyrgos	Greece		1930-04-05	1			PMC2030498
59		Greece		1930-04-30	1		Monthly data	PMC2030518
60	Patras	Greece		1930-06-21	1			PMC2030513
61		Greece		1930-06-30	1		Monthly data	PMC2030525
62	Saint-Ouen	France		1930-07-19	1	1		PMC2030513
63	Patras	Greece		1930-07-19	1			PMC2030513
64	Marseille	France		1930-08-30	2			PMC2030522
65	Marseille	France		1930-09-06	2			PMC2030522
66	Marseille	France		1930-09-13	1			PMC2030522
67	Pyrgos	Greece		1930-10-04	2			PMC2030525
68	Marseille	France		1930-10-18	4			PMC2030525
69	Marseille	France		1930-10-25	2			PMC2030525
70	Marseille	France		1930-11-01	1			PMC2030525
71	Marseille	France		1930-11-15	1			PMC2030525
72	L'Hospitalet de Llobregat, Barcelona	Spain		1931-08-22	5	2		PMC1996665
73	L'Hospitalet de Llobregat, Barcelona	Spain		1931-08-29	1			PMC1996674
74	L'Hospitalet de Llobregat, Barcelona	Spain		1931-09-19	1	1		PMC1996674
75	L'Hospitalet de Llobregat, Barcelona	Spain		1931-09-26	1	1		PMC1996674
76	L'Hospitalet de Llobregat, Barcelona	Spain		1931-10-03	1			PMC1996674
77	L'Hospitalet de Llobregat, Barcelona	Spain		1931-10-10	1	1		PMC1996674
78	L'Hospitalet de Llobregat, Barcelona	Spain		1931-10-24	5	1		PMC1996699
79	Déville-lès-Rouen	France		1931-10-31	P			PMC1996699
80	L'Hospitalet de Llobregat, Barcelona	Spain		1931-11-07	1			PMC1996699
81	L'Hospitalet de Llobregat, Barcelona	Spain		1931-11-14	1			PMC1996699
82	Avonmouth	United Kingdom		1931-12-27	1		On vessel SS Marionga de Thermiotis at Avonmouth	PMC1996590
83	Marseille	France		1932-09-03	1		On SS Figuig at Marseille from Bona and Philippeville	PMC1995488
84	Marseille	France		1932-12-31	1			PMC2016022
85	Marseille	France		1933-08-12	8	3		PMC2016800
86	Marseille	France		1935-10-19	2		On vessel SS Ipanema at Marseille; One of these cases was a member of the crew and the other was a stevedor believed to have worked on the vessel. Several plague infected rats were reported found on board the vessel.	PMC1996387
87		Malta		1936-04-18	3	2		PMC1996513
88		Malta		1936-05-02	1			PMC1996513
89		Malta		1936-06-06	3	1		PMC1996530
90		Malta		1936-08-01	1	1		PMC1996530
91		Malta		1936-08-08	2			PMC1996530
92	Marseille	France		1936-08-15	2		1 case on SS Impanema at Marseille from Bone and Philippeville	PMC1996535
93		Malta		1936-08-29	1			PMC1996530
94	Marseille	France		1936-09-05	1			PMC1996549
95	Marseille	France		1936-09-12	1			PMC1996549
96		Malta		1936-09-19	1			PMC1996549
97		Malta		1936-10-24	1			PMC2024179
98		Malta		1936-11-07	1			PMC2024318
99		Malta		1936-11-14	3			PMC2024318
100		Malta		1936-11-21	1			PMC2024318
101		Malta		1936-11-28	1			PMC2024318
102		Malta		1937-01-09	2	1		PMC2024498
103		Malta		1937-01-16	2			PMC2024498
104		Malta		1937-01-30	2			PMC2024498
105		Malta		1937-04-24	1			PMC2024692
106		Malta		1937-05-22	4			PMC2024696
107		Malta		1937-09-26	2			PMC1996549
108		Malta		1937-10-03	2			PMC2024179
109	Corsica	France		1945-05-19	2			PMC1976065
110	Corsica	France		1945-06-09	2			PMC1976072
111	Corsica	France		1945-06-23	1			PMC1976072
112		Malta		1945-06-30	4			PMC1976072
113	Corisca	France		1945-07-14	2			PMC1976078
114		Malta		1945-07-14	8			PMC1976078
115		Malta		1945-07-21	4			PMC1976078
116		Malta		1945-07-28	2			PMC1976078
117		Malta		1945-08-04	1			PMC1976081
118		Malta		1945-08-11	1			PMC1976081
119		Malta		1945-08-18	3			PMC1976081
120		Malta		1945-08-25	2			PMC1976081
121		Malta		1945-09-01	4			PMC1976088
122		Malta		1945-09-08	13			PMC1976088
123		Italy		1945-09-15	12			PMC1976088
124		Malta		1945-09-15	5			PMC1976088
125		Italy		1945-09-22	2			PMC1976088
126		Malta		1945-09-22	2			PMC1976088
127		Malta		1945-10-06	5			PMC1976093
128		Italy		1945-10-20	1			PMC1976093
129		Malta		1945-10-20	6			PMC1976093
130		Italy		1945-10-27	1			PMC1976093
131		Malta		1945-11-03	4			PMC1976103
132		Malta		1945-11-10	4			PMC1976103
133		Malta		1945-11-17	1			PMC1976103
134		Malta		1945-11-24	1			PMC1976103
135		Italy		1945-11-30	2		Monthly data	PMC1976108
136		Italy		1945-12-15	1			PMC1976108
137		Malta		1946-02-02	2			PMC1976137
138		Malta		1946-03-02	1			PMC1976142
139		Malta		1946-06-08	1			PMC1976154
140		Malta		1946-06-15	3			PMC1976154
141	Kaliningrad	Russia		1947-06-01	??		During the month of June 1947, an outbreak of plague with high mortality occurred in Konigsberge, East Prussia, Germany	PMC1995301
